# Supplementary material for: Stereodynamic insight into the thermal history effects on poly(vinyl chloride) calorimetric sub-glass and glass transitions as a fragile glass model
Source: Royal Society of Chemistry journal article supplement (doi:10.1039/c8cp00755a), 2018-01-01
Supplement: c8cp00755a1.pdf [file c8cp00755a1.pdf]

## ELECTRONIC SUPPORTING INFORMATION

### **Stereodynamic insight of the thermal history effect on poly(vinyl chloride) calorimetric sub-glass and glass transitions as fragile glass model**

Jean-Mathieu Pin<sup>a\*</sup>, Ehsan Behazin<sup>a,b</sup>, Manjusri Misra<sup>a,b</sup>, Amar Mohanty<sup>a,b\*</sup>

<sup>a</sup>*Bioproducts Discovery and Development Centre, Department of Plant Agriculture, Crop Science Building, University of Guelph, Guelph, N1G 2W1, Ontario, Canada.*

<sup>b</sup>*School of Engineering, Thornbrough Building, University of Guelph, Guelph, N1G 2W1, Ontario, Canada.*

*\*Email: jpin@uoguelph.ca; mohanty@uoguelph.ca*

- I. Sets of normalized  $C_p$  curves and fitting details from glass transition measurements.....S2
- II. Fitting details of the apparent activation energy surface.....S4

# I. Sets of normalized $C_p$ curves and fitting details from glass transition measurements

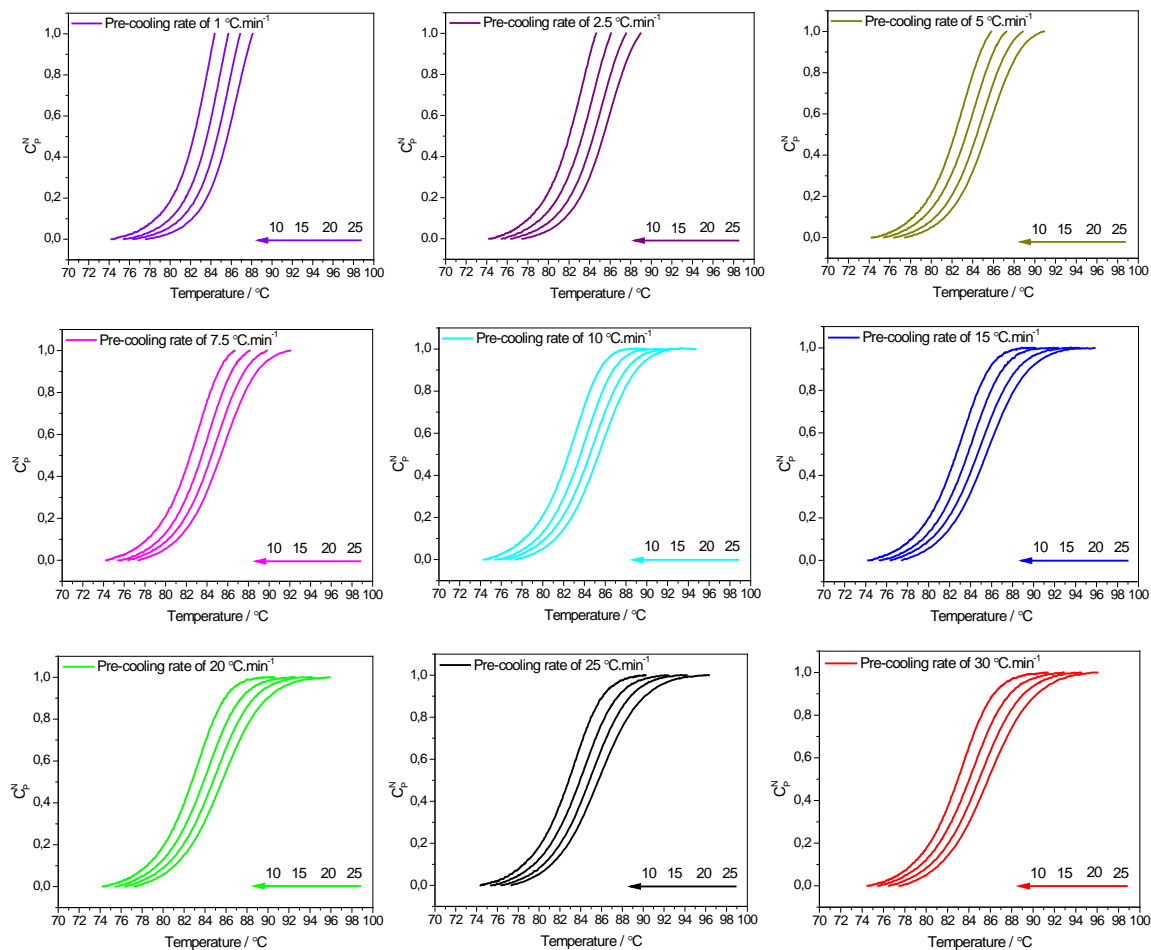

**Figure S1.** Normalized  $C_p$  curves assimilated to a conversion  $\alpha$ , each graphic contain a set of four curves collected at the heating rates of 10, 15, 20, 25 °C.min<sup>-1</sup> for a specific thermal history.

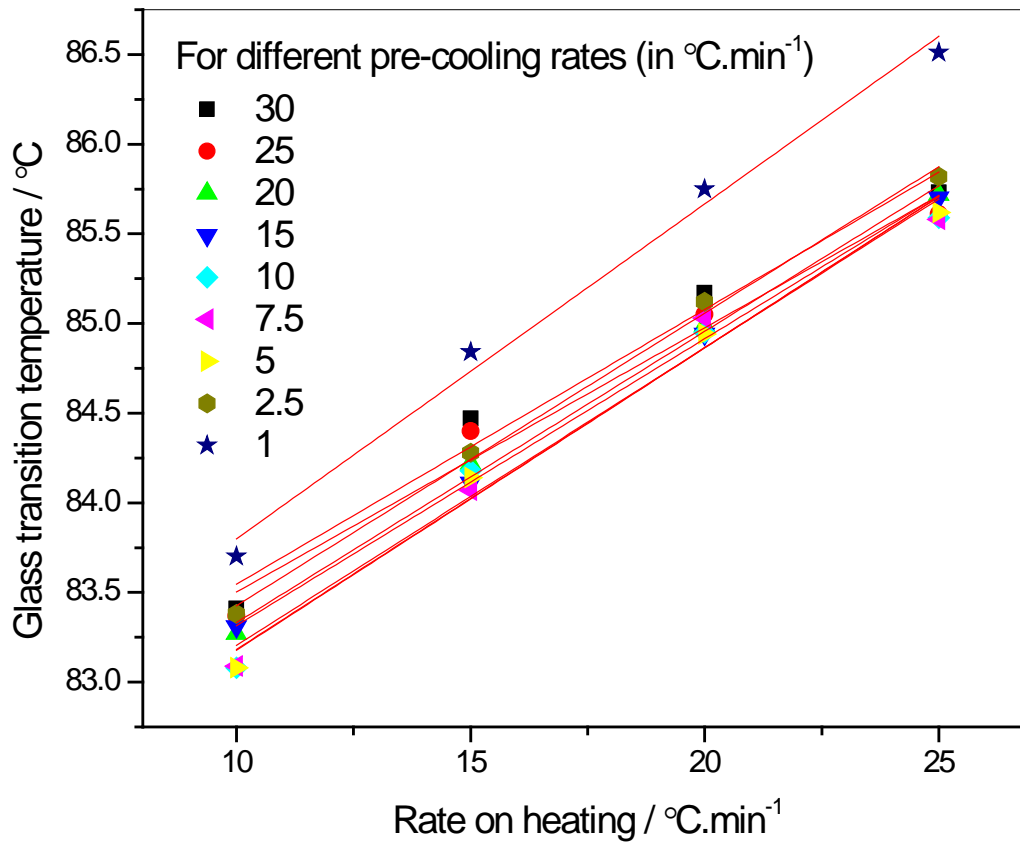

| Equation                | y = a + b*x |         |           |         |         |         |         |         |         |
|-------------------------|-------------|---------|-----------|---------|---------|---------|---------|---------|---------|
| Pre-cooling rate        | 1           | 2.5     | 5         | 7.5     | 10      | 15      | 20      | 25      | 30      |
| Residual Sum of Squares | 0.06492     | 0.05943 | 0.01308   | 9E-4    | 0.0549  | 0.05383 | 0.03708 | 0.01032 | 0.03642 |
| Pearson's r             | 0.98912     | 0.98924 | 0.99802   | 0.99986 | 0.99212 | 0.99251 | 0.99481 | 0.99845 | 0.99585 |
| Adj. R-Square           | 0.96753     | 0.96788 | 0.99407   | 0.99958 | 0.97647 | 0.97761 | 0.98447 | 0.99536 | 0.98758 |
| Pre-cooling rate        | Value       |         | Std Error |         |         |         |         |         |         |
| 1                       | Intercept   | 82.014  | 0.29604   |         |         |         |         |         |         |
|                         | Slope       | 0.1532  | 0.01611   |         |         |         |         |         |         |
| 2.5                     | Intercept   | 82.028  | 0.28325   |         |         |         |         |         |         |
|                         | Slope       | 0.1474  | 0.01542   |         |         |         |         |         |         |
| 5                       | Intercept   | 81.708  | 0.13288   |         |         |         |         |         |         |
|                         | Slope       | 0.1624  | 0.00723   |         |         |         |         |         |         |
| 7.5                     | Intercept   | 81.715  | 0.03486   |         |         |         |         |         |         |
|                         | Slope       | 0.16    | 0.0019    |         |         |         |         |         |         |
| 10                      | Intercept   | 81.545  | 0.27224   |         |         |         |         |         |         |
|                         | Slope       | 0.166   | 0.01482   |         |         |         |         |         |         |
| 15                      | Intercept   | 81.492  | 0.26957   |         |         |         |         |         |         |
|                         | Slope       | 0.1686  | 0.01467   |         |         |         |         |         |         |
| 20                      | Intercept   | 81.498  | 0.22374   |         |         |         |         |         |         |
|                         | Slope       | 0.1684  | 0.01218   |         |         |         |         |         |         |
| 25                      | Intercept   | 81.794  | 0.11803   |         |         |         |         |         |         |
|                         | Slope       | 0.1632  | 0.00642   |         |         |         |         |         |         |
| 30                      | Intercept   | 81.931  | 0.22174   |         |         |         |         |         |         |
|                         | Slope       | 0.1868  | 0.01207   |         |         |         |         |         |         |

**Figure S2.** Fits of the glass transition temperatures for different pre-cooling rates.

## II. Fitting details of the apparent activation energy surface

Polynomial fitted equation with related details can be found below:

$$z=z_0+a*x+b*y+c*x^2+d*y^2+f*x*y;$$

|   |    | Value      | Standard Error |
|---|----|------------|----------------|
| 1 | z0 | 388.37694  | 2.92927        |
| 1 | a  | -9.47999   | 0.864          |
| 1 | b  | 33.35855   | 8.09341        |
| 1 | c  | -0.77648   | 0.07748        |
| 1 | d  | -336.47117 | 6.88413        |
| 1 | f  | 26.10906   | 0.64696        |

Number of Points 846

Degrees of Freedom 840

Reduced Chi-Sqr 173.80489

Residual Sum of Squares 145996.11025

Adj. R-Square 0.95362
